# Supplementary material for: A sensitive method for protein assays using a peptide-based nano-label: human glypican-3 detection for hepatocellular carcinomas diagnosis
Source: Royal Society of Chemistry journal article supplement (doi:10.1039/c4an00599f), 2014-01-01
Supplement: c4an00599f1.pdf [file c4an00599f1.pdf]

**Supporting Information for  
A Sensitive Method for Protein Assay Using Peptide-based  
Nano-label: Human Glypican-3 Detection for  
Hepatocellular Carcinomas Diagnosis**

Yue Huang,<sup>a</sup> Hao Li,<sup>a</sup> Tao Gao,<sup>a</sup> Xinjian Liu,<sup>a</sup> and Genxi Li<sup>\*ab</sup>

<sup>a</sup> State Key Laboratory of Pharmaceutical Biotechnology and Department of Biochemistry,  
Nanjing University, Nanjing 210093, P R China.

<sup>b</sup> Laboratory of Biosensing Technology, School of Life Sciences, Shanghai University, Shanghai  
200444, P R China.

*\*Corresponding author: E-mail address: genxili@nju.edu.cn. Fax: +86 25 83592510.*

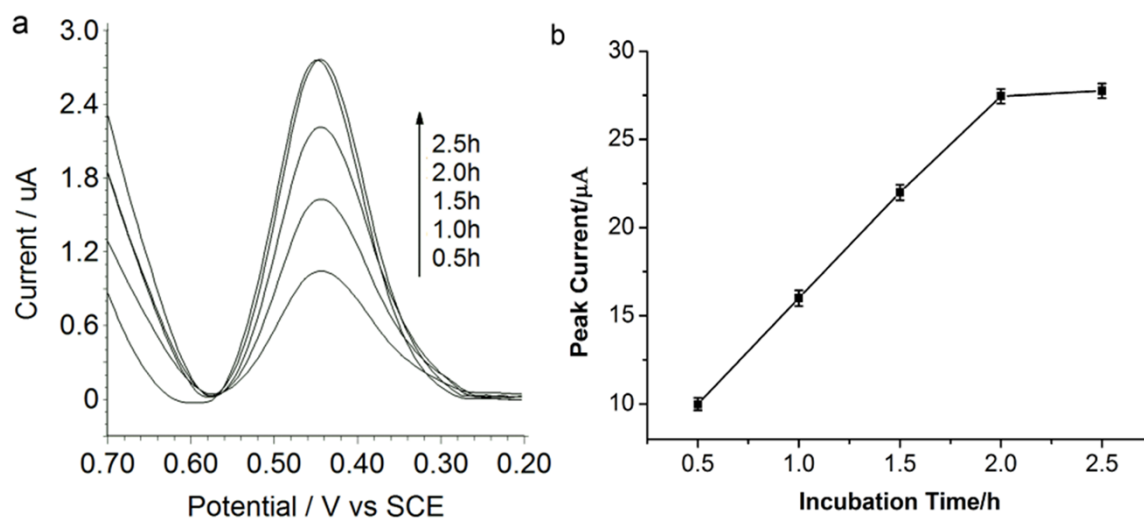

**Fig. S1** Optimization of GPC3 incubation time. (a) Square wave voltammograms obtained at the capture probe modified electrode after incubation with GPC3 for different time. Concentration of GPC3 is  $34.50 \text{ ng ml}^{-1}$ . (b) Relationship between the peak current and the incubation time. The error bars represent the standard deviation from average (n=3).

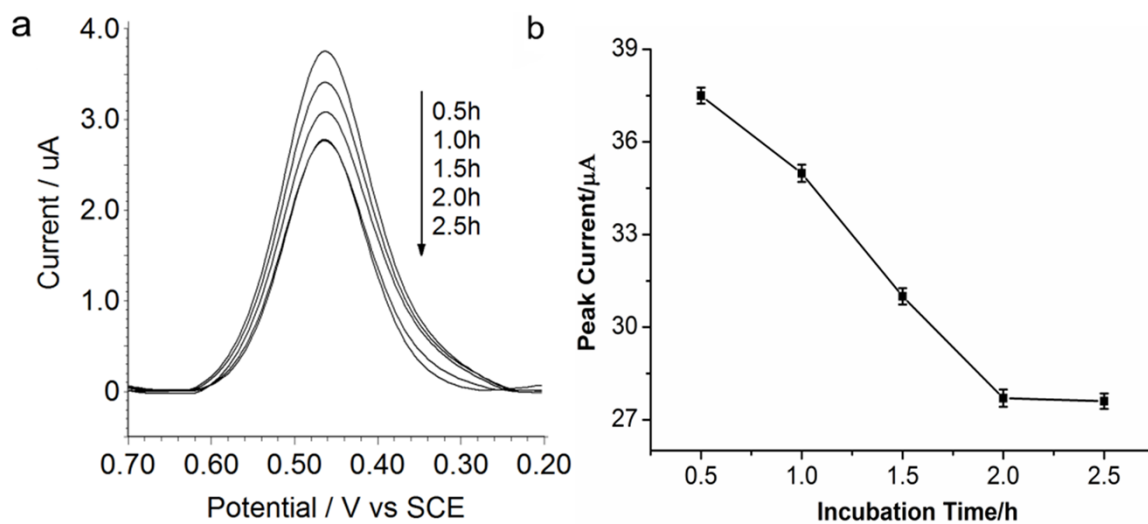

**Fig. S2** Optimization of cleavage time of thermolysin. (a) Square wave voltammograms obtained at the capture probe modified electrode after incubation with thermolysin for different time. Concentration of GPC3 is  $34.50 \text{ ng ml}^{-1}$ . (b) Relationship between the peak current and the incubation time. The error bars represent the standard deviation from average (n=3).
